# Supplementary material for: Construction of hierarchical NiCu-based bimetallic electrocatalysts for promoting the electrooxidation of biomass derivatives
Source: Royal Society of Chemistry journal article supplement (doi:10.1039/d3se00623a), 2023-01-01
Supplement: d3se00623a1.pdf [file d3se00623a1.pdf]

ARTICLE

## Construction of Hierarchical NiCu-based Bimetallic Electro catalysts for Promoting the Electrooxidation of Biomass Derivative

Received 00th January 20xx,  
Accepted 00th January 20xx

DOI: 10.1039/x0xx00000x

Yunliang Li, Yifang Fu, Yuqing Cao, Feifei Lei, Jun Zhao, Runwei Wang, Shilun Qiu and Zongtao Zhang<sup>\*a</sup>

---

<sup>a</sup>State Key Laboratory of Inorganic Synthesis and Preparative Chemistry, College of Chemistry, Jilin University, Changchun 130012, China. E-mail: zzhang@jlu.edu.cn

## ARTICLE

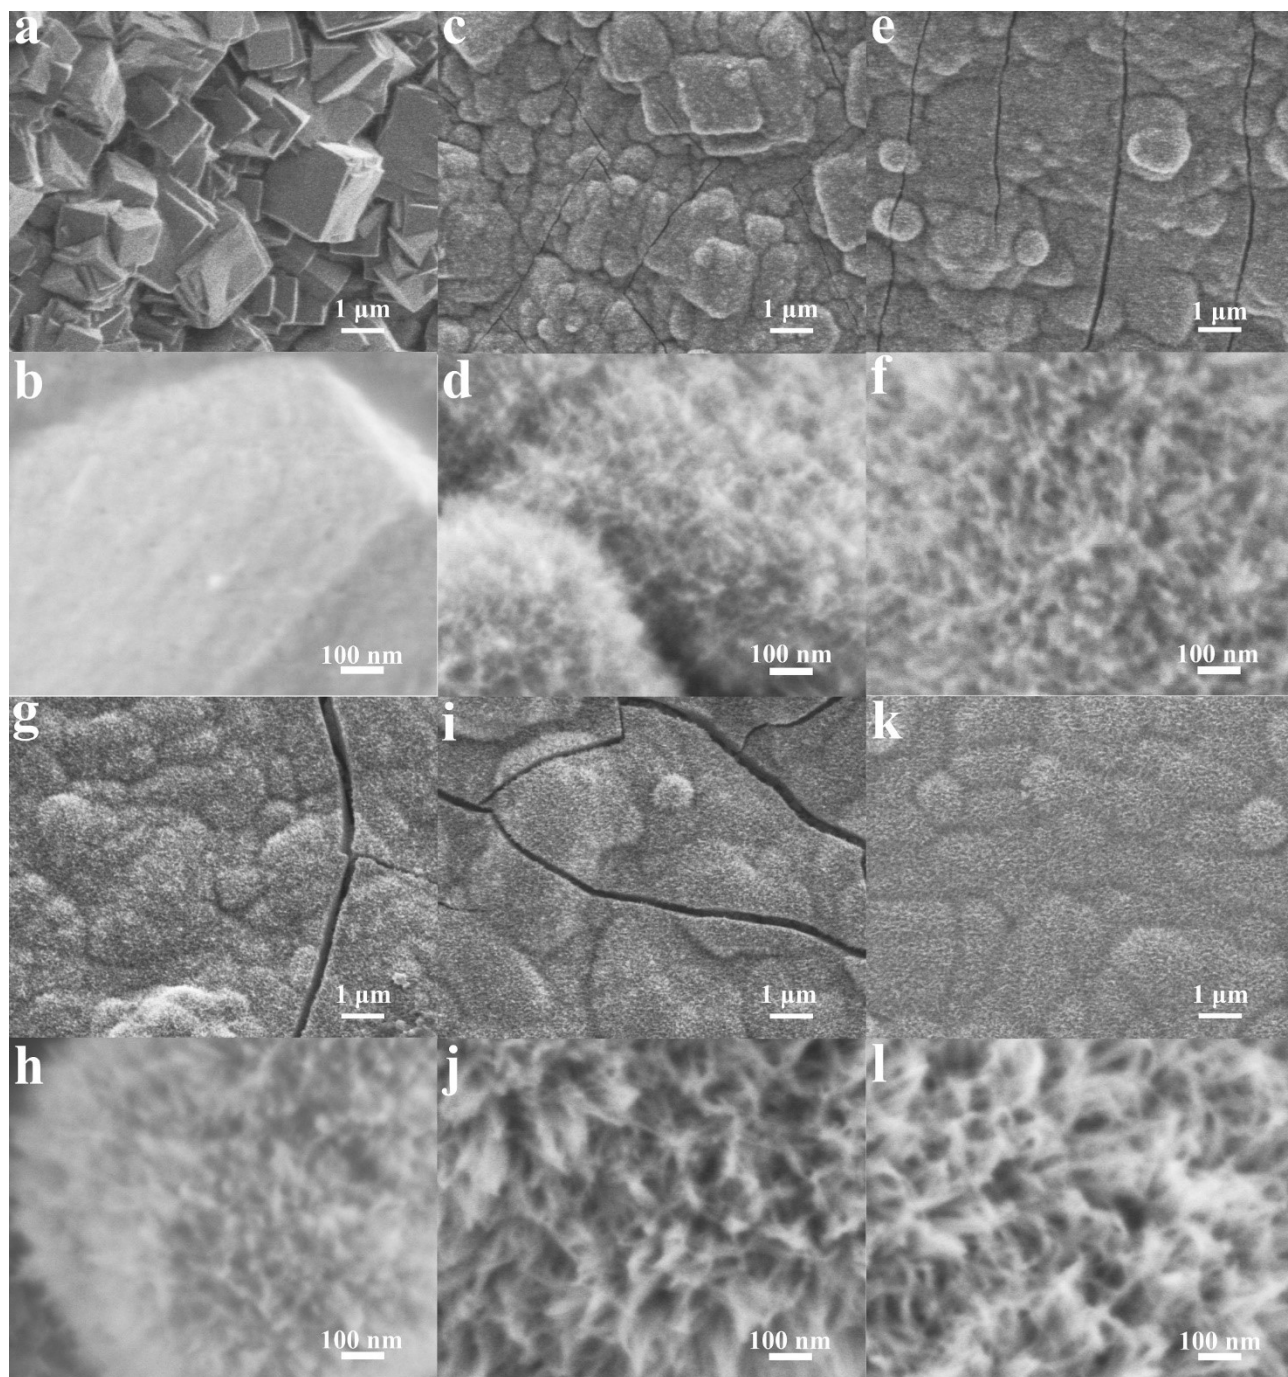

Figure S1. (a, b) SEM images of a-Ni(OH)<sub>2</sub>-Cu<sub>2</sub>O/NF-2. (c, d) SEM images of a-Ni(OH)<sub>2</sub>-Cu<sub>2</sub>O/NF-4. (e, f) SEM images of a-Ni(OH)<sub>2</sub>-Cu<sub>2</sub>O/NF-6. (g, h) SEM images of a-Ni(OH)<sub>2</sub>-Cu<sub>2</sub>O/NF-8. (i, j) SEM images of a-Ni(OH)<sub>2</sub>-Cu<sub>2</sub>O/NF-10. (k, l) SEM images of a-Ni(OH)<sub>2</sub>-Cu<sub>2</sub>O/NF-16.

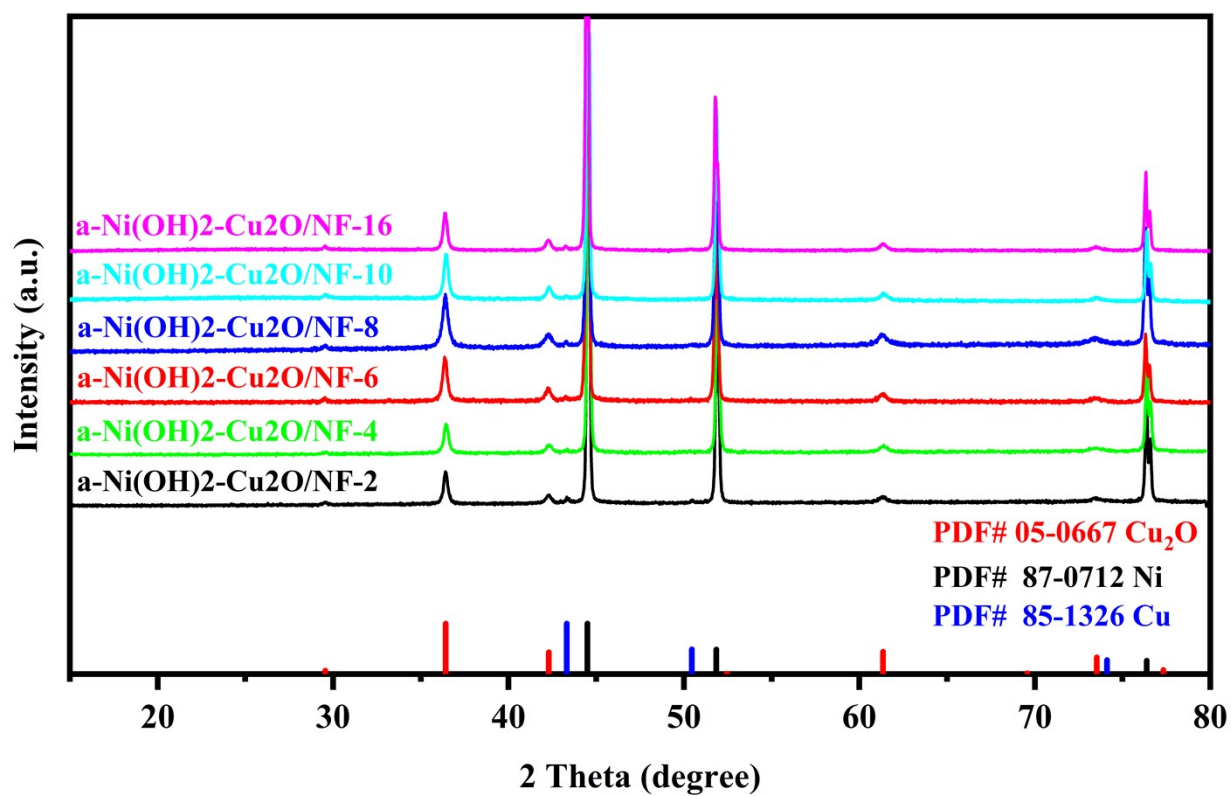Figure S2. XRD patterns of a-Ni(OH)<sub>2</sub>-Cu<sub>2</sub>O/NF-x.

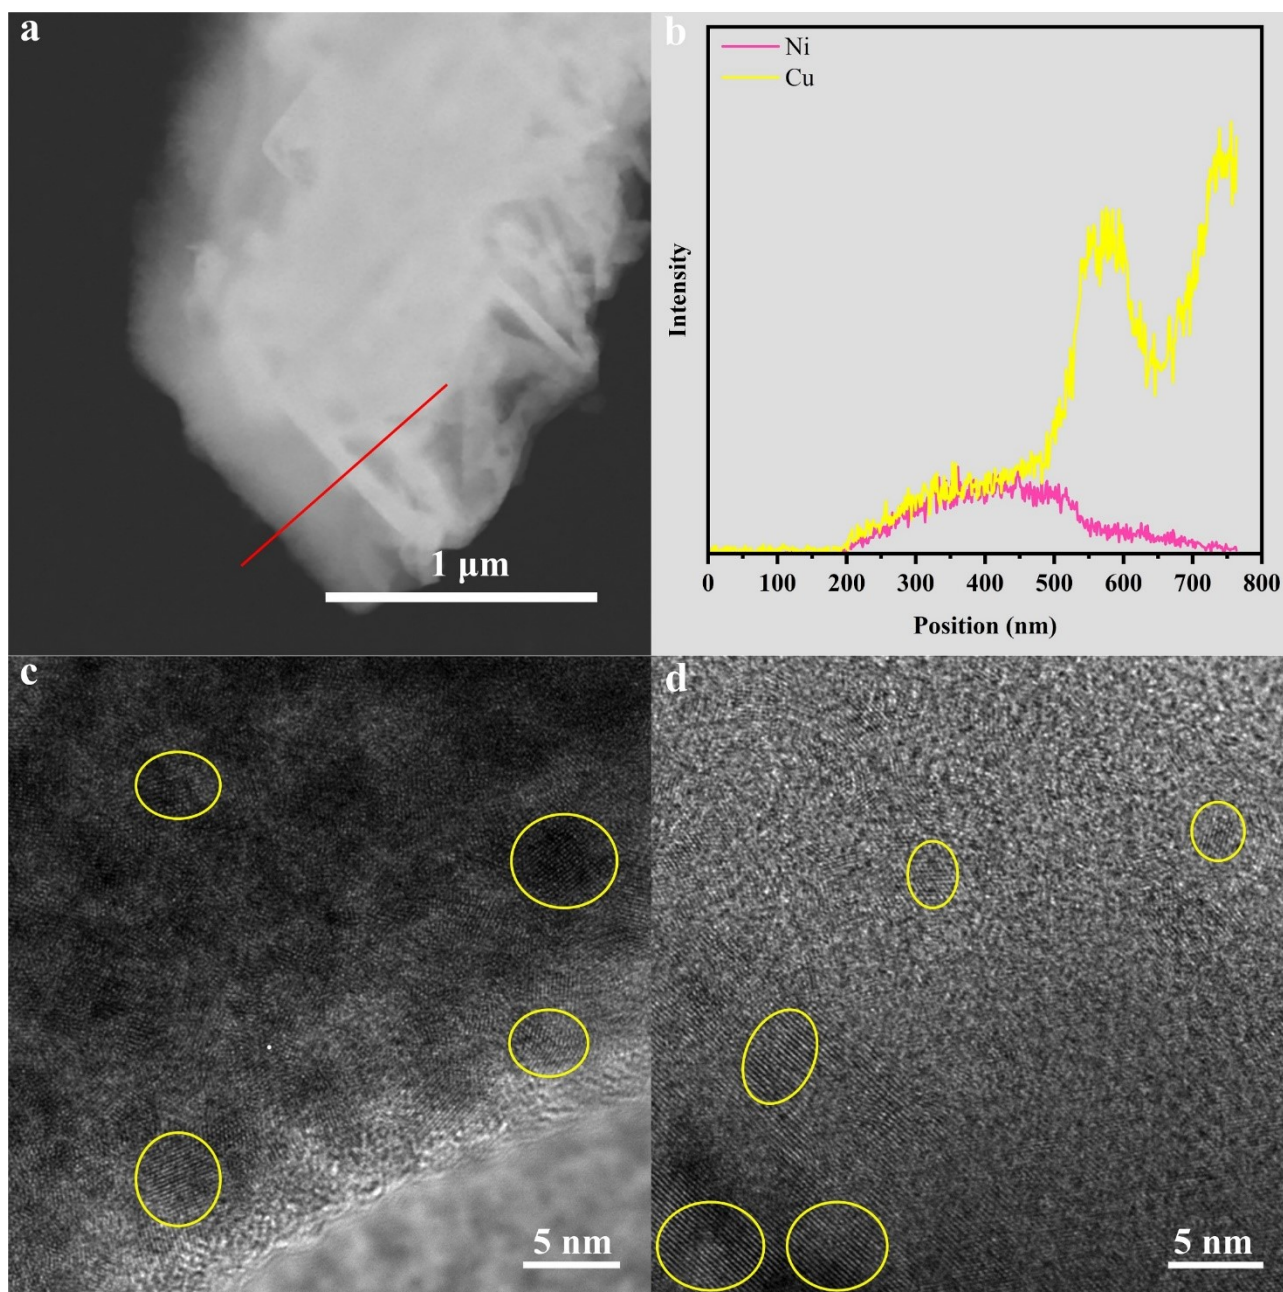

Figure S3. (a, b) TEM line-scan analysis of a-Ni(OH)<sub>2</sub>-Cu<sub>2</sub>O/NF-6. (c, d) HR-TEM of a-Ni(OH)<sub>2</sub>-Cu<sub>2</sub>O/NF-6.

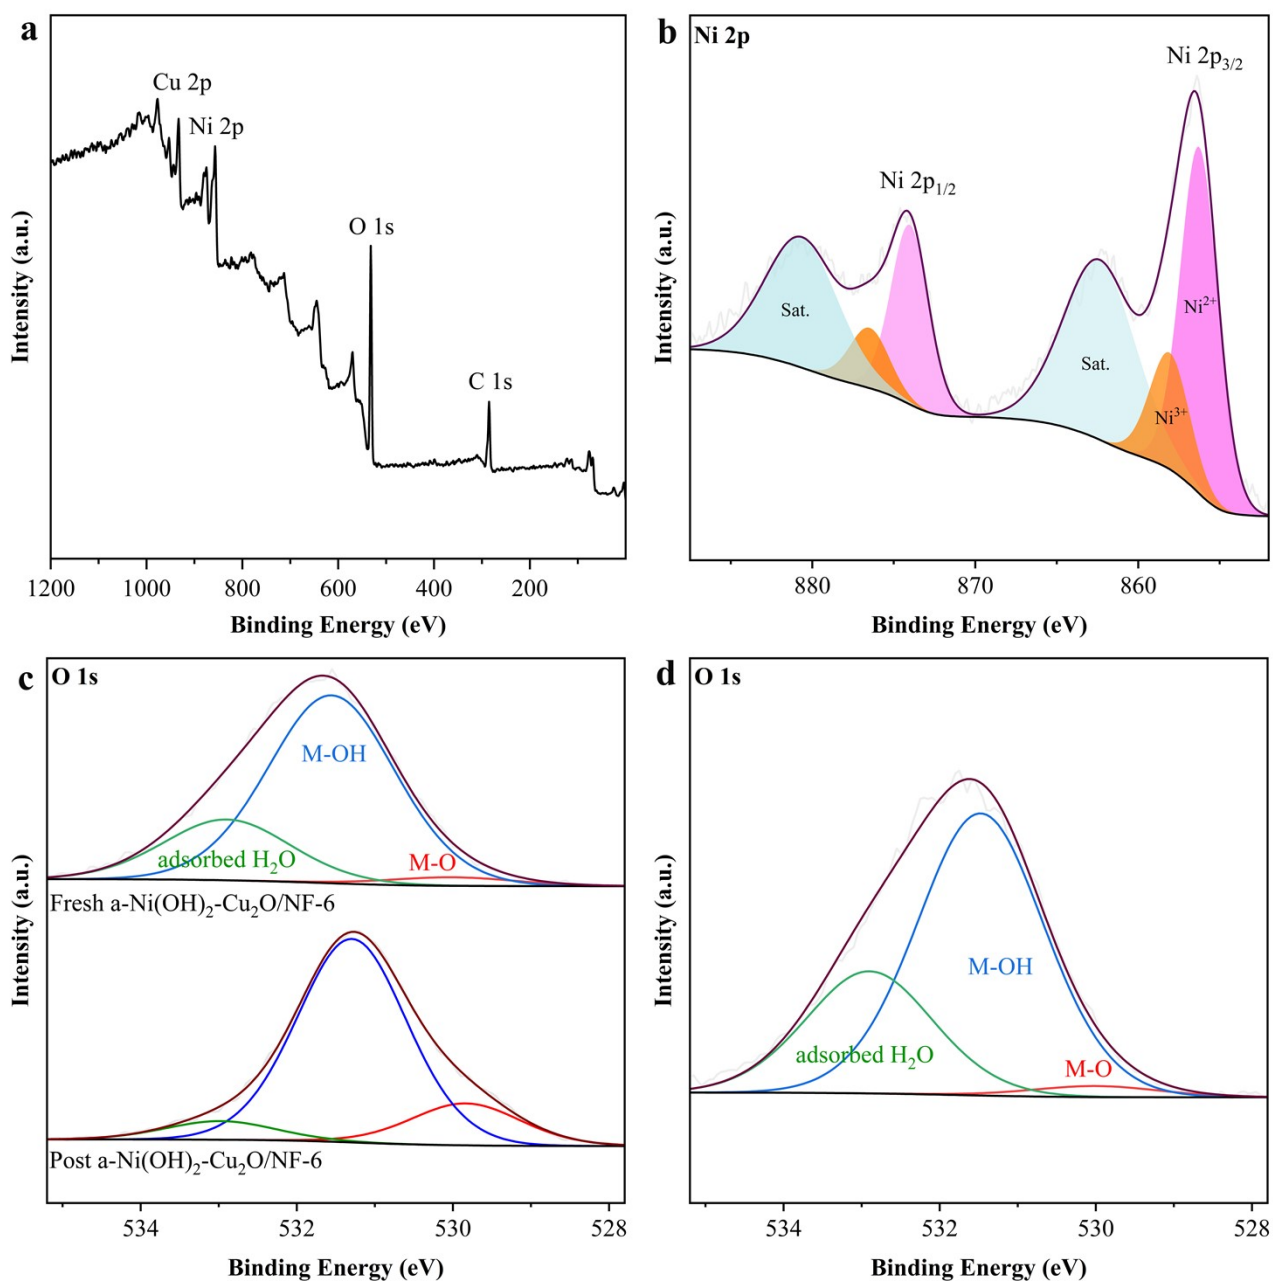

Figure S4. (a) XPS survey spectra of a-Ni(OH)<sub>2</sub>-Cu<sub>2</sub>O/NF-6. (b) High-resolution XPS spectra of Ni 2p for Ni(OH)<sub>2</sub>. (c) High-resolution XPS spectra of O 1s for fresh a-Ni(OH)<sub>2</sub>-Cu<sub>2</sub>O/NF-6 and post a-Ni(OH)<sub>2</sub>-Cu<sub>2</sub>O/NF-6. (d) High-resolution XPS spectra of O 1s for Ni(OH)<sub>2</sub>.

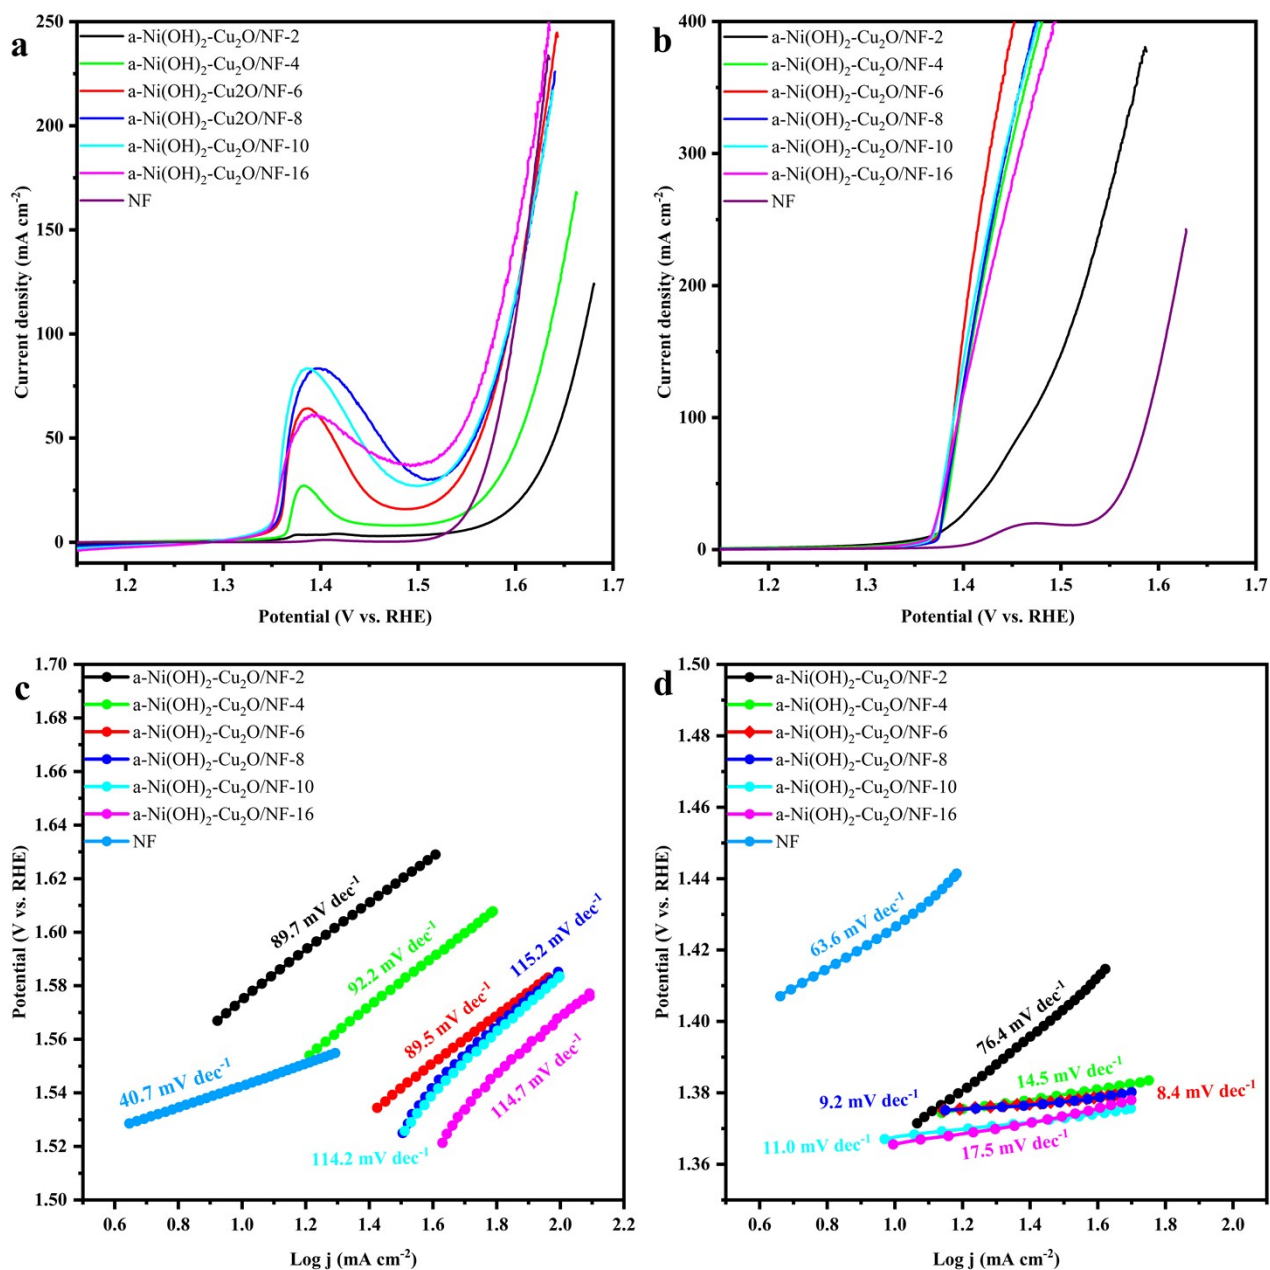

Figure S5. (a) LSV curves of a-Ni(OH)<sub>2</sub>-Cu<sub>2</sub>O/NF-x and NF at a scan rate of 5 mV s<sup>-1</sup> in 1 M KOH. (b) LSV curves of a-Ni(OH)<sub>2</sub>-Cu<sub>2</sub>O/NF-x and NF at a scan rate of 5 mV s<sup>-1</sup> in 1 M KOH with 50 mM HMF. (c) Tafel plots of a-Ni(OH)<sub>2</sub>-Cu<sub>2</sub>O/NF-x and NF for OER. (d) Tafel plots of a-Ni(OH)<sub>2</sub>-Cu<sub>2</sub>O/NF-x and bare NF for HMFEOR.

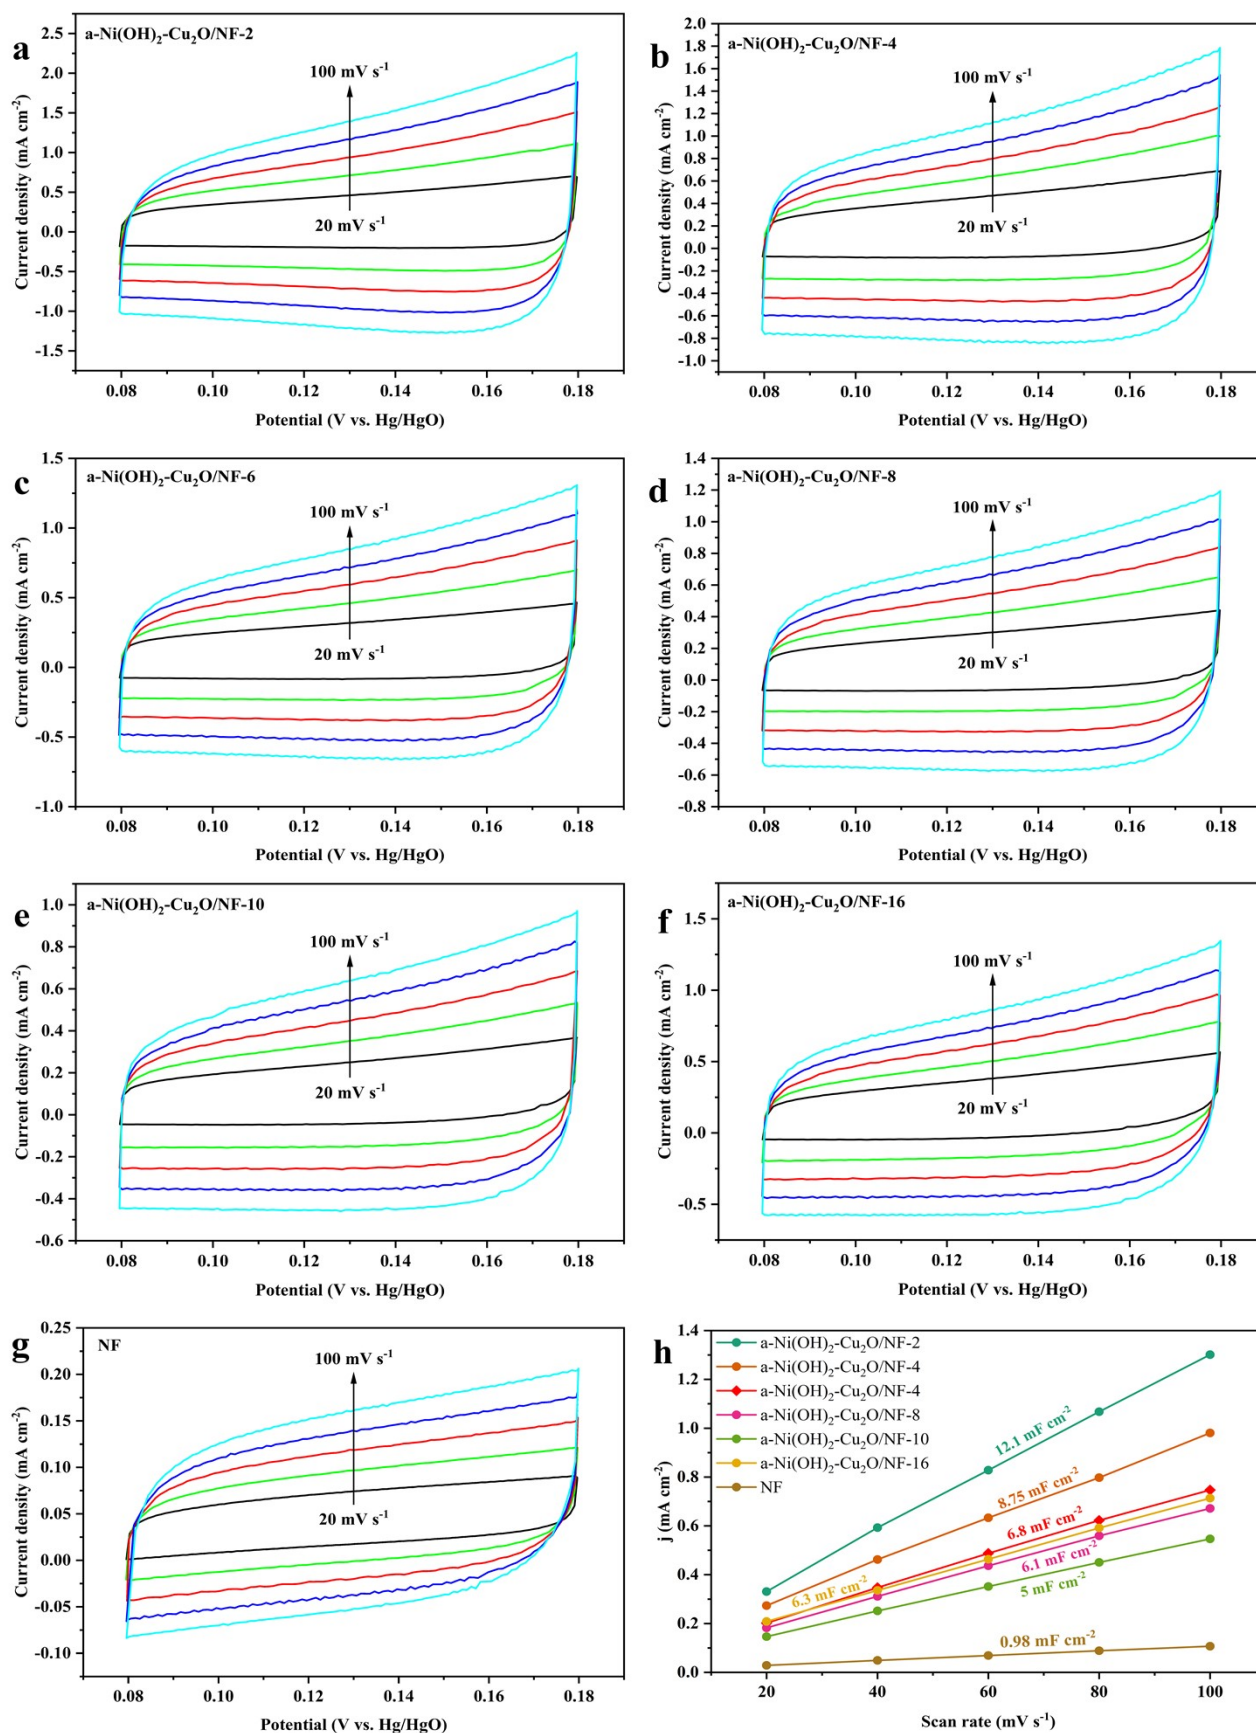

Figure S6. (a-g) CV curves of a-Ni(OH)<sub>2</sub>-Cu<sub>2</sub>O/NF-x and NF with 50 mM HMF at different scan rates. (h) calculated double layer capacitive of a-Ni(OH)<sub>2</sub>-Cu<sub>2</sub>O/NF-x and bare NF.

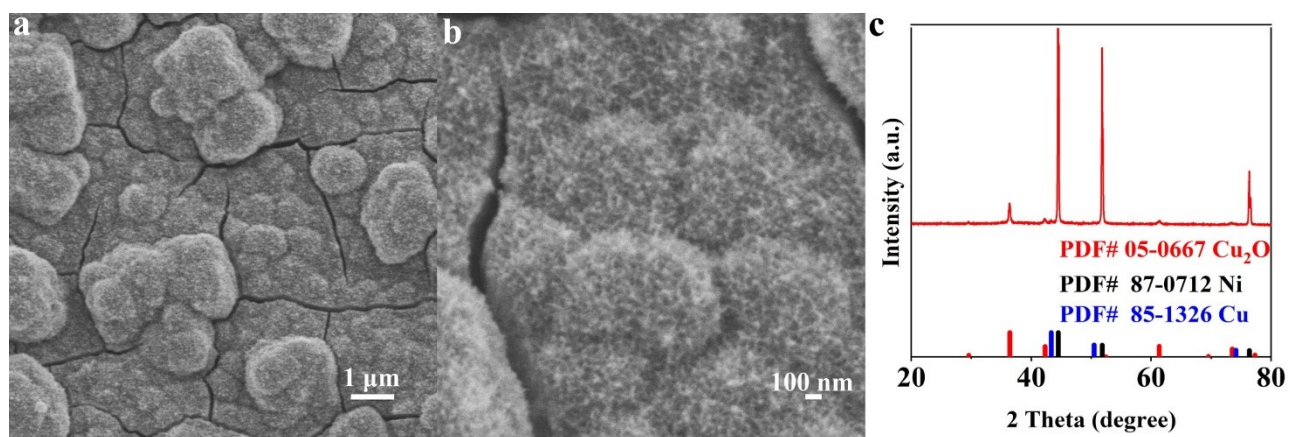

Figure S7. (a, b) SEM images of a-Ni(OH)<sub>2</sub>-Cu<sub>2</sub>O/NF-6 after LSV for HMFEOR, (c) XRD pattern of a-Ni(OH)<sub>2</sub>-Cu<sub>2</sub>O/NF-6 after LSV for HMFEOR



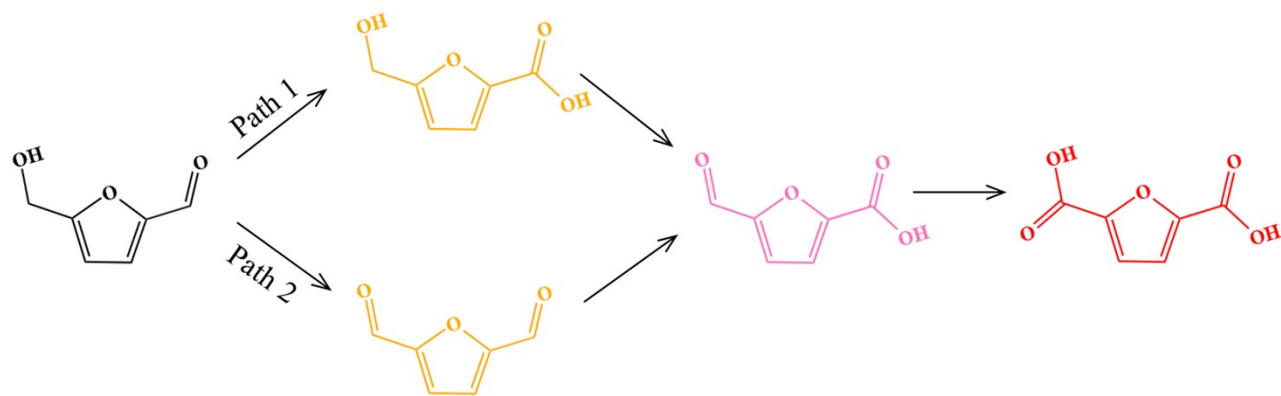

Figure S8. Two possible reaction routes for HMFEOR.

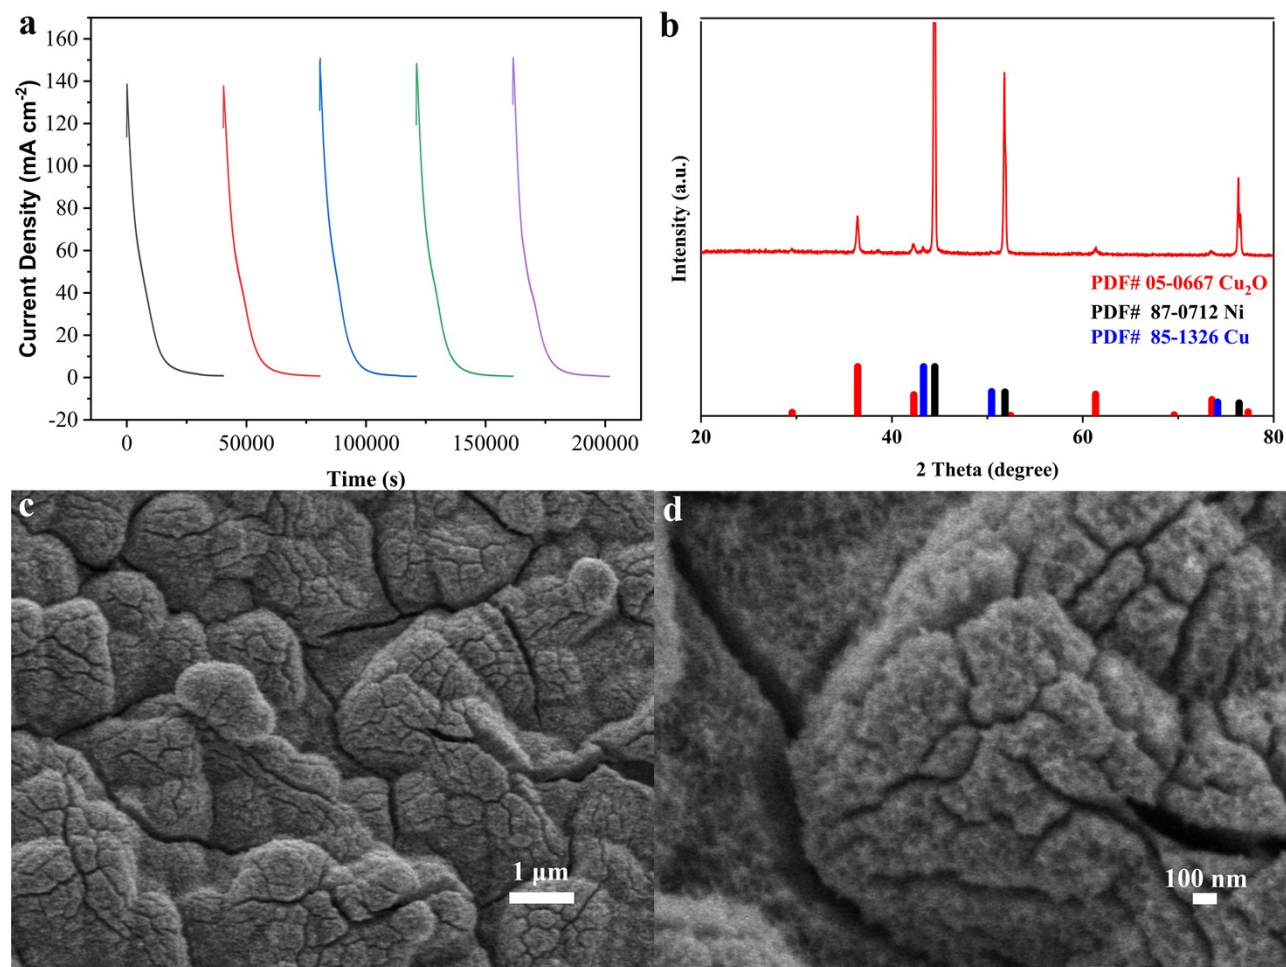

Figure S9. (a) i-t curve for a-Ni(OH)<sub>2</sub>-Cu<sub>2</sub>O/NF-6 at 1.424 V<sub>RHE</sub> for five successive cycles in 1M KOH with 100 mM HMF. (b) XRD pattern of a-Ni(OH)<sub>2</sub>-Cu<sub>2</sub>O/NF-6 after five successive cycles in 1M KOH with 100 mM HMF. (c, d) SEM images of a-Ni(OH)<sub>2</sub>-Cu<sub>2</sub>O/NF-6 after LSV for HMFEOR

| Electrocatalysts                                      | Potential (versus RHE) and current  | $C_{\text{HMF}}$ (mM) | Ref.      |
|-------------------------------------------------------|-------------------------------------|-----------------------|-----------|
| CoCu                                                  | 1.38 V (16.71 mA cm <sup>-2</sup> ) | 50                    | [1]       |
| Pt/Ni(OH) <sub>2</sub>                                | 1.5 V (37.31 mA cm <sup>-2</sup> )  | 50                    | [2]       |
| NiFe-1                                                | 1.478 V (500 mA cm <sup>-2</sup> )  | 50                    | [3]       |
| NiFe-LDH                                              | 1.5 V (~180 mA cm <sup>-2</sup> )   | 50                    | [4]       |
| P-HEOs                                                | 1.5 V (~55 mA cm <sup>-2</sup> )    | 50                    | [5]       |
| CF-Cu(OH) <sub>2</sub>                                | 1.82 V (198.2 mA cm <sup>-2</sup> ) | 100                   | [6]       |
| Vo-NiO                                                | 1.5 V (~60 mA cm <sup>-2</sup> )    | 100                   | [7]       |
| NiCu NTs                                              | 1.424 V (~136 mA cm <sup>-2</sup> ) | 20                    | [8]       |
| CF-CuO/CeO <sub>2</sub>                               | 1.92 V (~125 mA cm <sup>-2</sup> )  | 10                    | [9]       |
| CuMn <sub>2</sub> O <sub>4</sub> -NH <sub>3</sub> -40 | 1.31 V (20 mA cm <sup>-2</sup> )    | 10                    | [10]      |
| Ni <sub>0.9</sub> Cu <sub>0.1</sub> (OH) <sub>2</sub> | 1.52 V (10 mA cm <sup>-2</sup> )    | 5                     | [11]      |
| CuNi(OH) <sub>2</sub>                                 | 1.45 V (9.2 mA cm <sup>-2</sup> )   | 5                     | [12]      |
| NF@Mo-Ni <sub>0.85</sub> Se                           | 1.5 V (~115 mA cm <sup>-2</sup> )   | 10                    | [13]      |
| Ni <sub>3</sub> N@C                                   | 1.38 V (50 mA cm <sup>-2</sup> )    | 10                    | [14]      |
| Ni <sub>x</sub> B                                     | 1.45 V (100 mA cm <sup>-2</sup> )   | 10                    | [15]      |
| Ni <sub>3</sub> S <sub>2</sub> /NF                    | 1.55 V (~25 mA cm <sup>-2</sup> )   | 10                    | [16]      |
| a-Ni(OH) <sub>2</sub> -Cu <sub>2</sub> O/NF-6         | 1.38 V (50 mA cm <sup>-2</sup> )    | 50                    | This work |
| a-Ni(OH) <sub>2</sub> -Cu <sub>2</sub> O/NF-6         | 1.45 V (400 mA cm <sup>-2</sup> )   | 50                    | This work |

Table S1. The comparison of current density for a-Ni(OH)<sub>2</sub>-Cu<sub>2</sub>O/NF-6 and previous reported electrocatalysts.

| Electrocatalysts                                                        | Oxidation potential (versus RHE) | C <sub>HMF</sub> (mM) | n <sub>HMF</sub> (mmol) | Charge transferred | Ref.      |
|-------------------------------------------------------------------------|----------------------------------|-----------------------|-------------------------|--------------------|-----------|
| Vo-NiO                                                                  | 1.42 V                           | 100                   | 10                      | 6680 C             | [7]       |
| NiCu NTs                                                                | 1.424 V                          | 20                    | 4                       | 2300 C             | [8]       |
| Ni <sub>3</sub> S <sub>2</sub> -MoS <sub>2</sub> /NF                    | 1.45 V                           | 20                    | 3                       | 1735 C             | [17]      |
| MoO <sub>2</sub> -FeP@C                                                 | 1.424                            | 10                    | 2                       | 1160 C             | [18]      |
| Co <sub>9</sub> S <sub>8</sub> -Ni <sub>3</sub> S <sub>2</sub> @NSOC/NF | 1.4 V                            | 10                    | 2                       | 1160 C             | [19]      |
| Ni <sub>x</sub> Se <sub>y</sub> -NiFe LDH@NF                            | 1.423 V                          | 10                    | 1.86                    | 1080 C             | [20]      |
| Ni <sub>3</sub> N@C                                                     | 1.45 V                           | 10                    | 1.8                     | 1044 C             | [14]      |
| Co <sub>0.4</sub> NiS@NF                                                | 1.45 V                           | 10                    | 1.1                     | 578 C              | [21]      |
| NiSe@NiO <sub>x</sub>                                                   | 1.423 V                          | 10                    | 0.6                     | 348 C              | [22]      |
| t-Ni <sub>1</sub> Co <sub>1</sub> -MOF                                  | 1.4 V                            | 10                    | 0.5                     | 290 C              | [23]      |
| a-Ni(OH) <sub>2</sub> -Cu <sub>2</sub> O/NF-6                           | 1.424 V                          | 100                   | 7.5                     | ~4300 C            | This work |

Table S2. The comparison of charge transferred in stable test for a-Ni(OH)<sub>2</sub>-Cu<sub>2</sub>O/NF-6 and previous reported electrocatalysts.

## References

1. Y. Zhu, J. Shi, Y. Li, Y. Lu, B. Zhou, S. Wang and Y. Zou, *Journal of Energy Chemistry*, 2022, **74**, 85-90.
2. B. Zhou, Y. Li, Y. Zou, W. Chen, W. Zhou, M. Song, Y. Wu, Y. Lu, J. Liu, Y. Wang and S. Wang, *Angewandte Chemie International Edition*, 2021, **60**, 22908-22914.
3. C. Wang, Y. Wu, A. Bodach, M. L. Krebs, W. Schuhmann and F. Schüth, *Angewandte Chemie International Edition*, 2023, **62**, e202215804.
4. W.-J. Liu, L. Dang, Z. Xu, H.-Q. Yu, S. Jin and G. W. Huber, *ACS Catalysis*, 2018, **8**, 5533-5541.
5. K. Gu, D. Wang, C. Xie, T. Wang, G. Huang, Y. Liu, Y. Zou, L. Tao and S. Wang, *Angewandte Chemie International Edition*, 2021, **60**, 20253-20258.
6. X. Pang, H. Bai, H. Zhao, W. Fan and W. Shi, *ACS Catalysis*, 2022, **12**, 1545-1557.
7. H. Wang, J. Zhang and S. Tao, *Chemical Engineering Journal*, 2022, **444**, 136693.
8. L. Zheng, Y. Zhao, P. Xu, Z. Lv, X. Shi and H. Zheng, *Journal of Materials Chemistry A*, 2022, **10**, 10181-10191.
9. X. Pang, H. Zhao, Y. Huang, Y. Liu, H. Bai, W. Fan and W. Shi, *Inorganic Chemistry*, 2022, **61**, 8940-8954.
10. B. Zhu, Y. Qin, J. Du, F. Zhang and X. Lei, *ACS Sustainable Chemistry & Engineering*, 2021, **9**, 11790-11797.
11. J. Zhang, P. Yu, G. Zeng, F. Bao, Y. Yuan and H. Huang, *Journal of Materials Chemistry A*, 2021, **9**, 9685-9691.
12. H. Chen, J. Wang, Y. Yao, Z. Zhang, Z. Yang, J. Li, K. Chen, X. Lu, P. Ouyang and J. Fu, *ChemElectroChem*, 2019, **6**, 5797-5801.
13. C. Yang, C. Wang, L. Zhou, W. Duan, Y. Song, F. Zhang, Y. Zhen, J. Zhang, W. Bao, Y. Lu, D. Wang and F. Fu, *Chemical Engineering Journal*, 2021, **422**, 130125.
14. N. Zhang, Y. Zou, L. Tao, W. Chen, L. Zhou, Z. Liu, B. Zhou, G. Huang, H. Lin and S. Wang, *Angewandte Chemie International Edition*, 2019, **58**, 15895-15903.
15. S. Barwe, J. Weidner, S. Cychy, D. M. Morales, S. Dieckhöfer, D. Hiltrop, J. Masa, M. Muhler and W. Schuhmann, *Angewandte Chemie International Edition*, 2018, **57**, 11460-11464.
16. W. Wang, F. Kong, Z. Zhang, L. Yang and M. Wang, *Dalton Transactions*, 2021, **50**, 10922-10927.
17. S. Yang, Y. Guo, Y. Zhao, L. Zhang, H. Shen, J. Wang, J. Li, C. Wu, W. Wang, Y. Cao, S. Zhuo, Q. Zhang and H. Zhang, *Small*, 2022, **18**, 2201306.
18. G. Yang, Y. Jiao, H. Yan, Y. Xie, A. Wu, X. Dong, D. Guo, C. Tian and H. Fu, *Advanced Materials*, 2020, **32**, 2000455.
19. Y. Zhang, Z. Xue, X. Zhao, B. Zhang and T. Mu, *Green Chemistry*, 2022, **24**, 1721-1731.
20. Y. Zhong, R.-Q. Ren, J.-B. Wang, Y.-Y. Peng, Q. Li and Y.-M. Fan, *Catalysis Science & Technology*, 2022, **12**, 201-211.
21. Y. Sun, J. Wang, Y. Qi, W. Li and C. Wang, *Advanced Science*, 2022, **9**, 2200957.
22. L. Gao, Z. Liu, J. Ma, L. Zhong, Z. Song, J. Xu, S. Gan, D. Han and L. Niu, *Applied Catalysis B: Environmental*, 2020, **261**, 118235.
23. X. Deng, M. Li, Y. Fan, L. Wang, X.-Z. Fu and J.-L. Luo, *Applied Catalysis B: Environmental*, 2020, **278**, 119339.
